# Supplementary material for: Introducing vacancy defects to induce ferroelectric-like switching in antiferroelectric oxides
Source: Royal Society of Chemistry journal article supplement (doi:10.1039/d5tc03563e), 2025-11-25
Supplement: d5tc03563e1.pdf [file d5tc03563e1.pdf]

## Supplementary Information

### Introducing Vacancy Defects to Induce Ferroelectric-like Switching in Antiferroelectric Oxides

Anil Adukkadan\*, Pooja Punetha and Rajeev Ranjan

Department of Materials Engineering,  
Indian Institute of Science,  
Bengaluru, Karnataka, India- 560012

\*Corresponding Author- Anil Adukkadan

Email: anilpakkam@gmail.com

**Figure S1** (a) XRD patterns of (i) PNZST53/35/12, PNZST53/38/09, and PNZST53/40/07; patterns in the  $2\theta$  range  $37-45^\circ$  is given in (b).

**Figure S2** (a) XRD patterns of  $\text{Pb}_{0.995}(\text{Zr}_{0.53}\text{Sn}_{0.40}\text{Ti}_{0.07})_{0.99(1-x)}\text{Nb}_{0.01}\text{Fe}_x\text{O}_3$ ; patterns in the  $2\theta$  range  $37-45^\circ$  are given in (b).

**Figure S3** (a)-(c) P-E, S-E and I-E hysteresis curves of PNZST53/35/12, PNZST53/38/09 and PNZST53/40/07.

**Figure S4** (i) P-E hysteresis curves (ii) first and second cycle S-E curves (iii) first and second cycle I-E curves of  $\text{Pb}_{0.995}(\text{Zr}_{0.53}\text{Sn}_{0.40}\text{Ti}_{0.07})_{0.99(1-x)}\text{Nb}_{0.01}\text{Fe}_x\text{O}_3$ ;  $x=(a) 0.012$ , (b)  $0.020$ , (c)  $0.024$ .

**Figure S5** In-situ XRD patterns of  $\text{Pb}_{0.995}(\text{Zr}_{0.53}\text{Sn}_{0.40}\text{Ti}_{0.07})_{0.99(1-x)}\text{Nb}_{0.01}\text{Fe}_x\text{O}_3$ ; (a) $x=0$ ; (b) $0.030$  in the  $2\theta$  range  $37.5-38.5^\circ$ ,  $43.5-44.5^\circ$  and  $80.5-81.5^\circ$  at room temperature by applying an electric field of reverse polarity

**Figure S6** XPS spectrum of Fe2p of  $\text{Pb}_{0.995}(\text{Zr}_{0.53}\text{Sn}_{0.40}\text{Ti}_{0.07})_{0.99(1-x)}\text{Nb}_{0.01}\text{Fe}_x\text{O}_3$  ceramics; (a)  $x=0.010$  and (b)  $x=0.030$ .

**Figure S7** (a)-(c) P-E, S-E and I-E hysteresis curves of  $\text{Pb}_{0.995}(\text{Zr}_{0.53}\text{Sn}_{0.40}\text{Ti}_{0.07})_{0.99(1-x)}\text{Nb}_{0.01}\square_x\text{O}_3$ ; where  $x=0.010$ .

**Figure S8** (a) P-E hysteresis curves (b) S-E curves of  $\text{Pb}_{0.995}(\text{Zr}_{0.53}\text{Sn}_{0.40}\text{Ti}_{0.07})_{0.99(1-x)}\text{Nb}_{0.01}\text{Fe}_x\text{O}_3$ ;  $x=0.030$ .

**Figure S9** Le-Bail fitted x-ray diffraction patterns of (a)  $x=0$ , (b) $x=0.010$ , (c) $x=0.012$  at room temperature.  $\{111\}$  and  $\{200\}$  peaks are shown in insets. For fitting, the  $P4mm$  space group is used.

**Figure S10** Le-Bail fitted x-ray diffraction patterns of (a)  $x=0.020$ , (b) $x=0.024$ , (c) $x=0.030$  at room temperature.  $\{111\}$  and  $\{200\}$  peaks are shown in insets. For fitting, the  $P4mm$  space group is used.

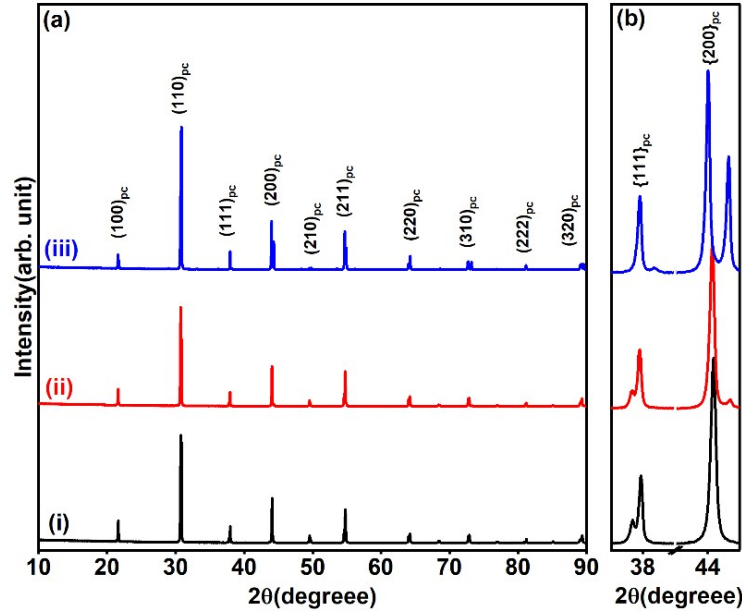

Figure S1 (a) XRD patterns of (i) PNZST53/35/12, PNZST53/38/09, and PNZST53/40/07; patterns in the 2θ range 37-45° is given in (b).

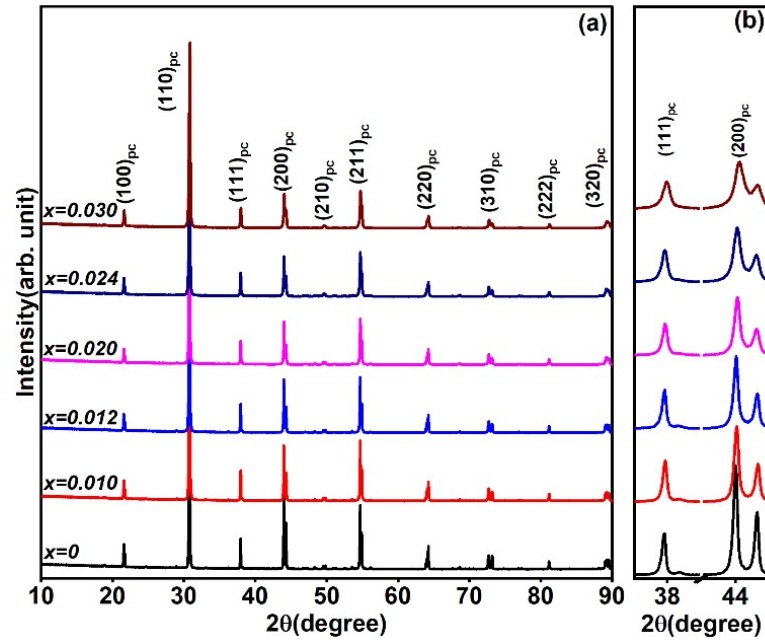

Figure S2 (a) XRD patterns of  $Pb_{0.995}(Zr_{0.53}Sn_{0.40}Ti_{0.07})_{0.99(1-x)}Nb_{0.01}Fe_xO_3$ ; patterns in the 2θ range 37-45° are given in (b).

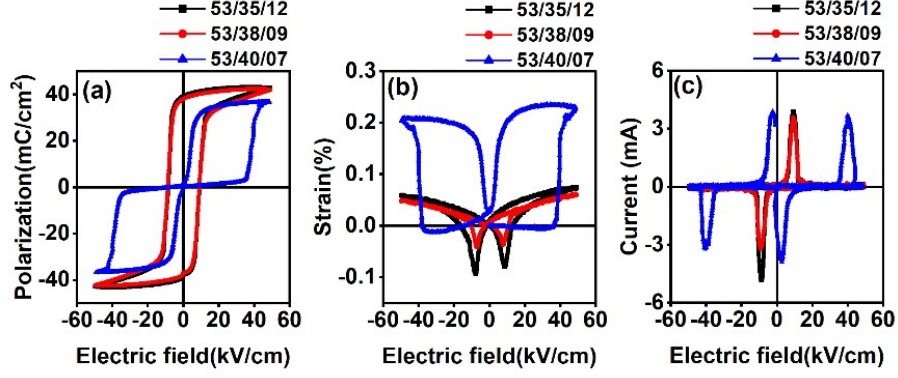

Figure S3 (a)-(c) P-E, S-E and I-E hysteresis curves of PNZST53/35/12, PNZST53/38/09 and PNZST53/40/07.

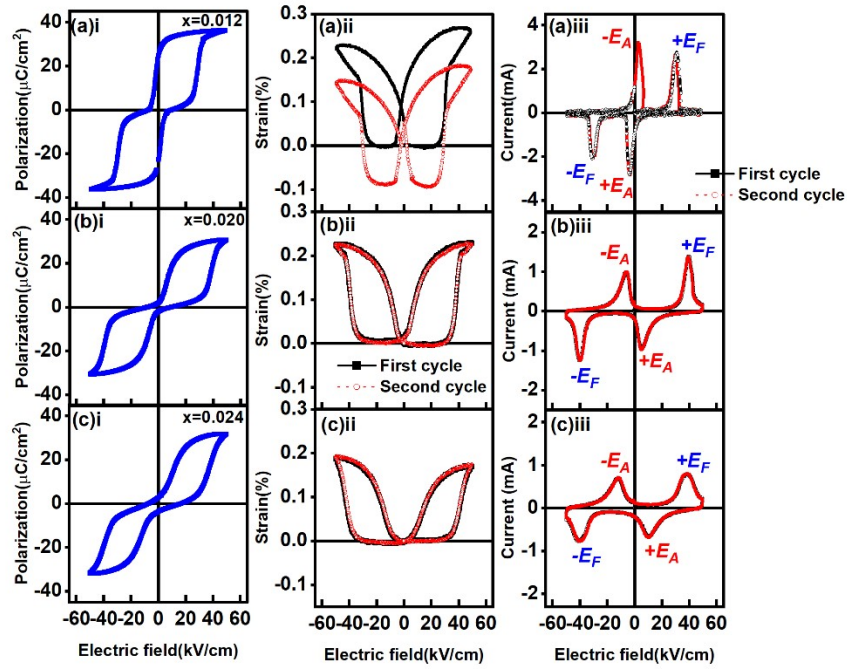

Figure S4 (i) P-E hysteresis curves (ii) first and second cycle S-E curves (iii) first and second cycle I-E curves of  $Pb_{0.995}(Zr_{0.53}Sn_{0.40}Ti_{0.07})_{0.99(1-x)}Nb_{0.01}Fe_xO_3$ ;  $x = (a) 0.012, (b) 0.020, (c) 0.024$ .

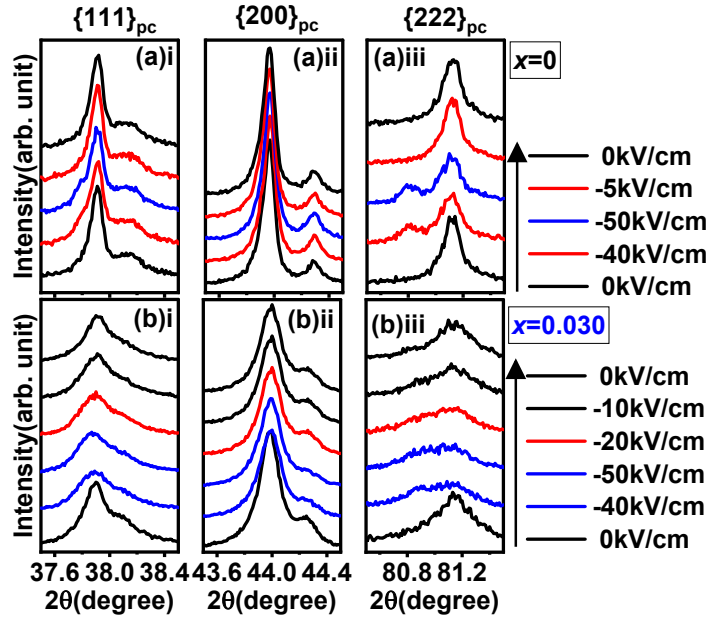

Figure S5 In-situ XRD patterns of  $Pb_{0.995}(Zr_{0.53}Sn_{0.40}Ti_{0.07})_{0.99(1-x)}Nb_{0.01}Fe_xO_3$ ; (a)  $x=0$ ; (b)  $x=0.030$  in the  $2\theta$  range (i)  $37.5-38.5^\circ$ , (ii)  $43.5-44.5^\circ$  and (iii)  $80.5-81.5^\circ$  at room temperature by applying an electric field of reverse polarity

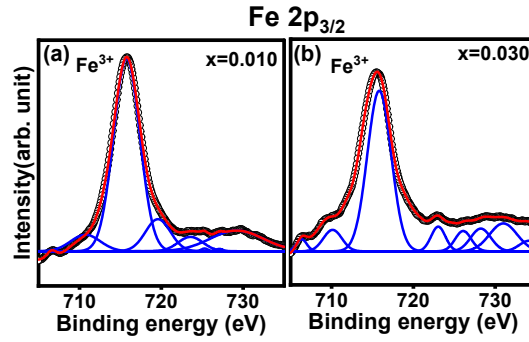

Figure S6 XPS spectrum of Fe2p of  $Pb_{0.995}(Zr_{0.53}Sn_{0.40}Ti_{0.07})_{0.99(1-x)}Nb_{0.01}Fe_xO_3$  ceramics; (a)  $x=0.010$  and (b)  $x=0.030$ .

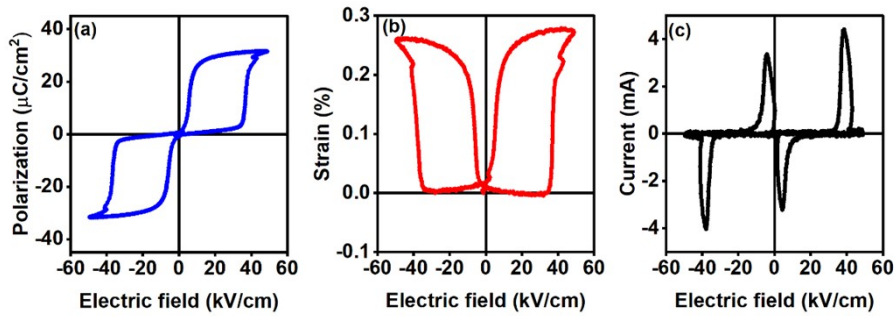

Figure S7 (a)-(c) P-E, S-E and I-E hysteresis curves of  $Pb_{0.995}(Zr_{0.53}Sn_{0.40}Ti_{0.07})_{0.99(1-x)}Nb_{0.01}\square_xO_3$ ; where  $x=0.010$ .

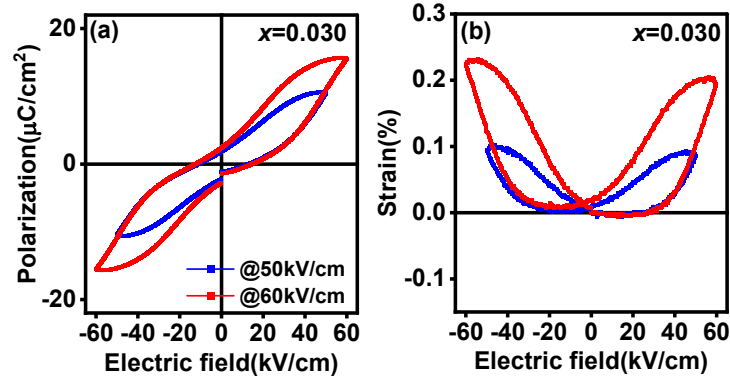

Figure S8(a) *P-E* hysteresis curves (b) *S-E* curves of  $Pb_{0.995}(Zr_{0.53}Sn_{0.40}Ti_{0.07})_{0.99(1-x)}Nb_{0.01}Fe_xO_3$ ;  $x = 0.030$ .

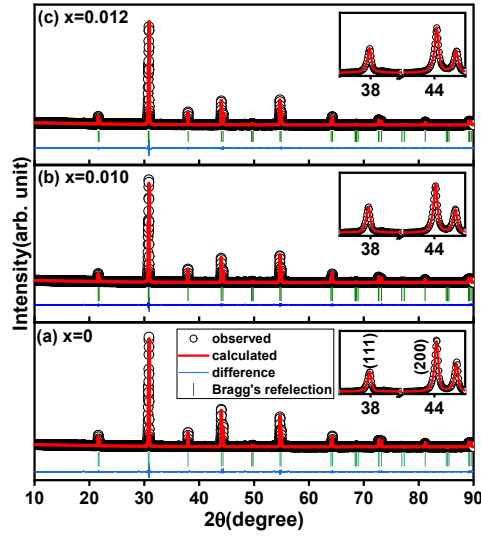

Figure S9 Le-Bail fitted x-ray diffraction patterns of (a)  $x=0$ , (b)  $x=0.010$ , (c)  $x=0.012$  at room temperature.  $\{111\}$  and  $\{200\}$  peaks are shown in insets. For fitting, the  $P4mm$  space group is used.

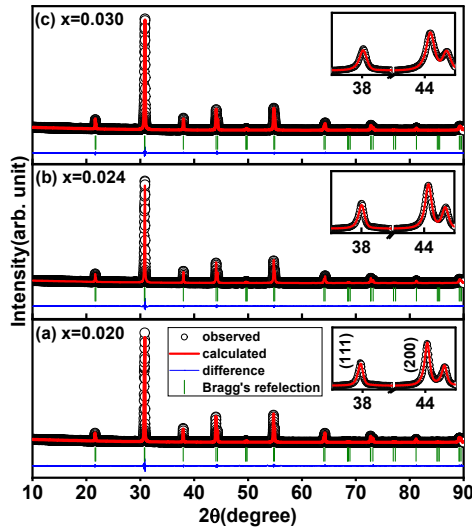

Figure S10 Le-Bail fitted x-ray diffraction patterns of (a)  $x=0.020$ , (b)  $x=0.024$ , (c)  $x=0.030$  at room temperature.  $\{111\}$  and  $\{200\}$  peaks are shown in insets. For fitting, the  $P4mm$  space group is used.
